# Supplementary material for: Promoter Methylation of PRKCB, ADAMTS12, and NAALAD2 Is Specific to Prostate Cancer and Predicts Biochemical Disease Recurrence
Source: MDPI journal article supplement (doi:10.3390/ijms22116091), 2021-06-05
Supplement: s1 [file s1]

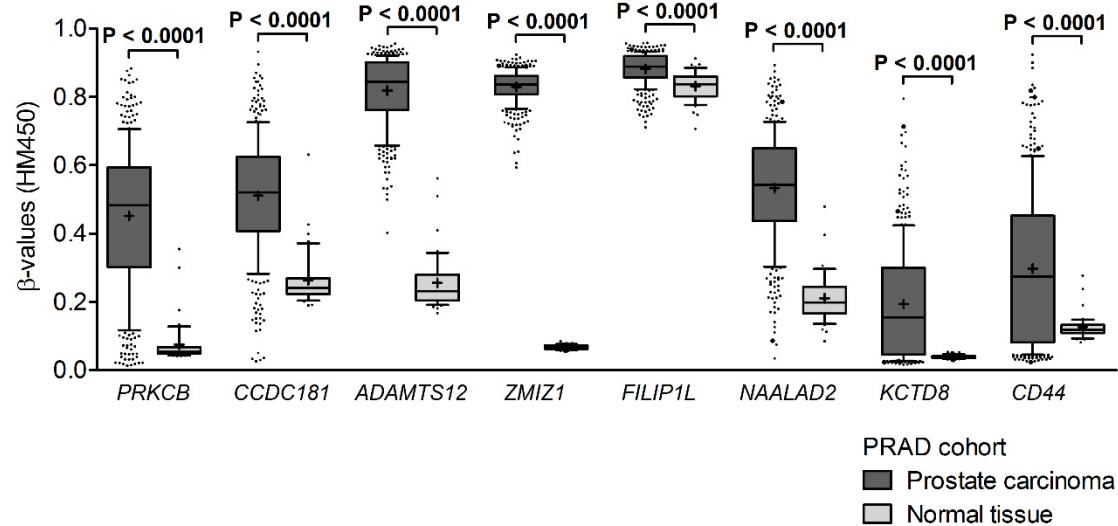

**Figure S1.** DNA methylation levels of selected genes in the Prostate Cancer Dataset (PRAD) [9]. Level 3 DNA methylation data, obtained using HM450 platform, were used to generate the plots. The depicted  $\beta$ -values are average values of the gene promoter regions. The boxplot depicts Q1-Q3 quartile, when the line in the box indicates the median, the plus sign indicates the mean, the whiskers represent 10-90% of the range and the outliers are marked as dots. Significant P-values are marked in bold.

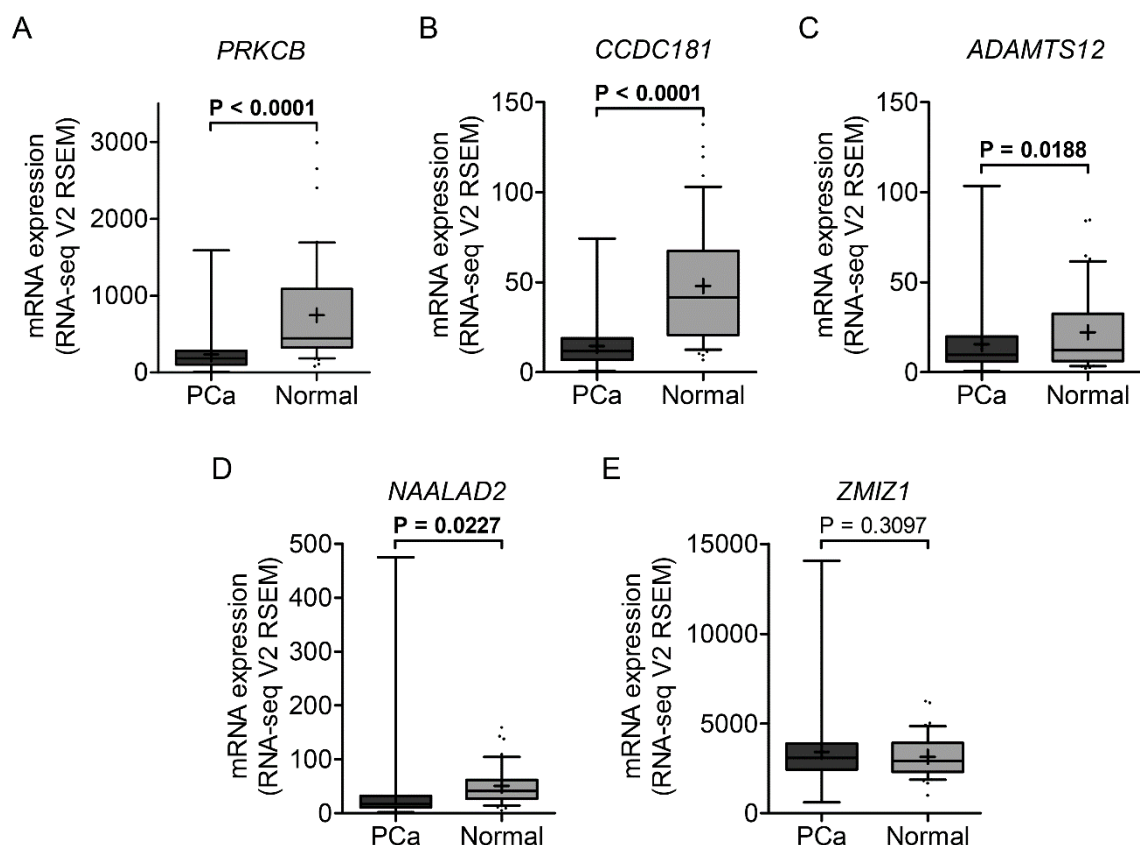

**Figure S2.** Relative expression levels of selected genes in the Prostate Cancer Dataset (PRAD) [9]. Level 3 PRAD RNA-seq RSEM data were used to generate the plots. The boxplot depicts Q1-Q3 quartile, when the line in the box indicates the median, the plus sign indicates the mean, the whiskers represent 10-90% of the range and the outliers are marked as dots. Significant P-values are marked in bold.

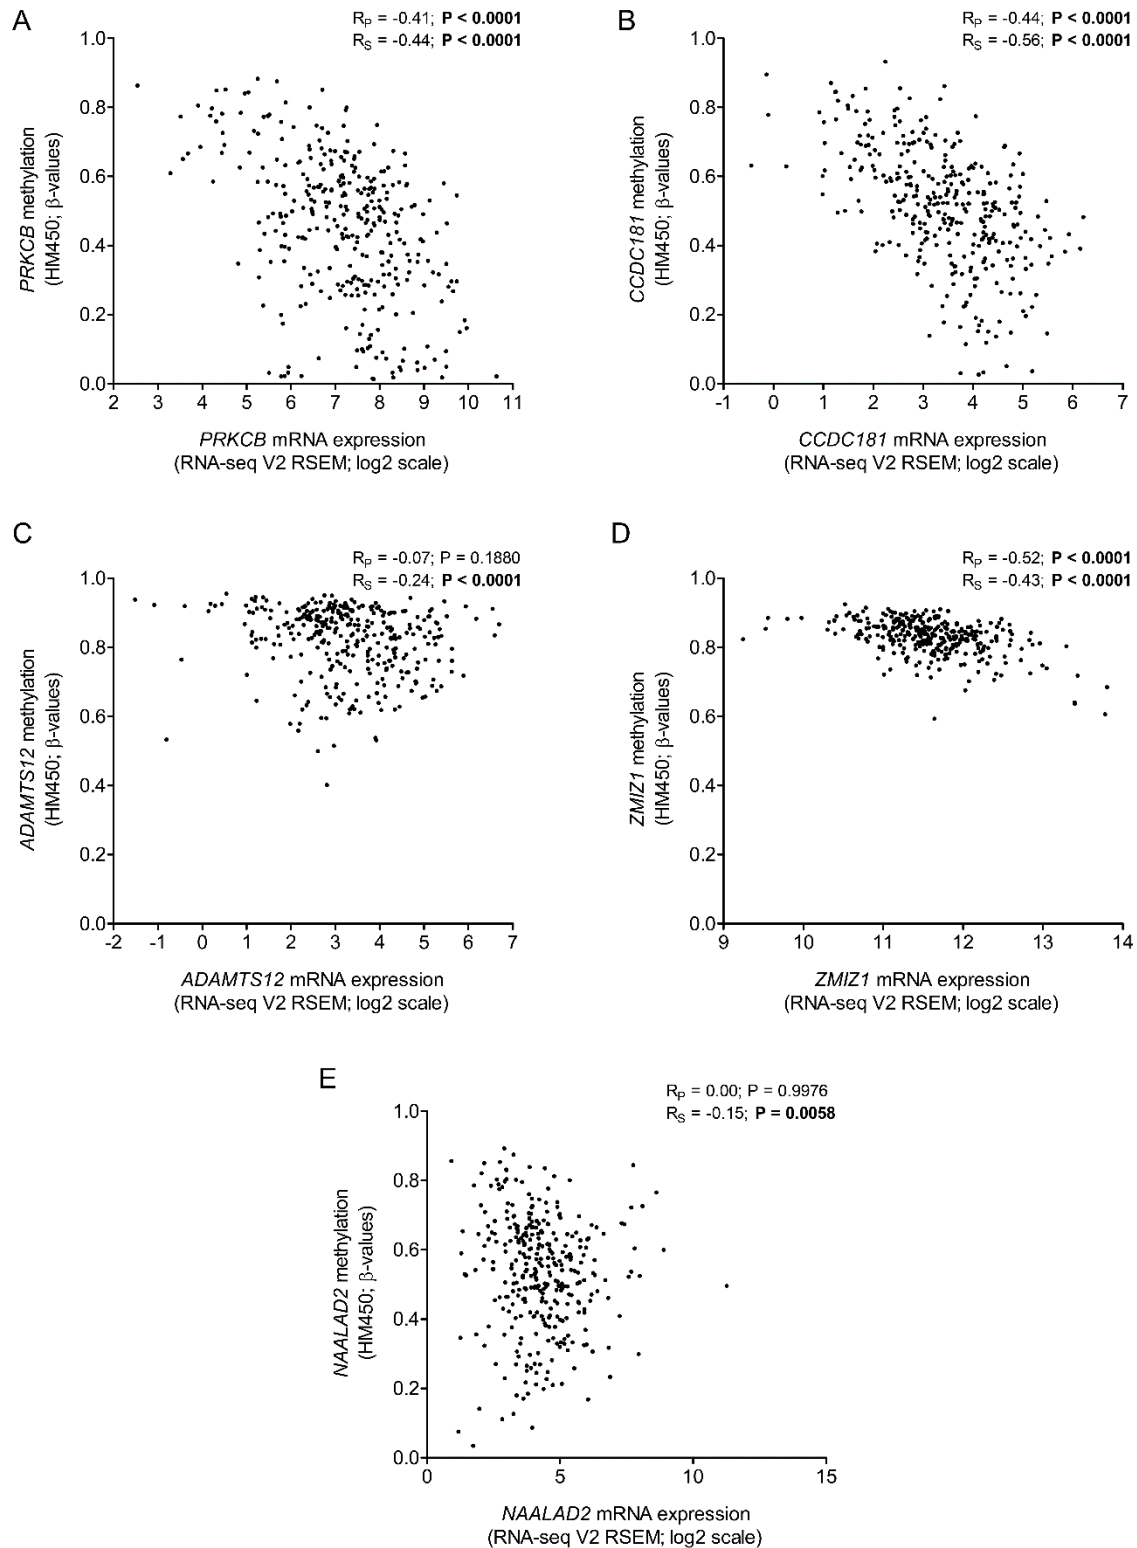

**Figure S3.** Correlations between promoter methylation status and gene expression levels of selected genes in the Prostate Cancer Dataset (PRAD) [9]. Level 3 DNA methylation data, obtained using HM450 platform, and level 3 PRAD RNA-seq RSEM data were used to generate scatter diagrams. RNA-seq data is plotted on log2 scale. Pearson's R (RP) and Spearman's R (RS) correlation coefficients are provided in the graphs. Significant P-values are marked in bold.

**Table S1.** Clinico-pathological and molecular characteristics of the analysis groups.

| Parameter                           | Methylation Analysis Group |                        |                        | Gene Expression Analysis Group <sup>1</sup> |                         |
|-------------------------------------|----------------------------|------------------------|------------------------|---------------------------------------------|-------------------------|
| Group composition                   | PCa<br>(N = 151)           | NPT<br>(N = 51)        | BPH<br>(N = 17)        | PCa<br>(N = 81)                             | NPT<br>(N = 25)         |
| Tumor stage, N                      |                            |                        |                        |                                             |                         |
| ≤pT2                                | 96                         | -                      | -                      | 51                                          | -                       |
| ≥pT3                                | 55                         | -                      | -                      | 30                                          | -                       |
| ISUP grade group (Gleason score), N |                            |                        |                        |                                             |                         |
| I (3 + 3)                           | 34                         | -                      | -                      | 13                                          | -                       |
| II (3 + 4)                          | 84                         | -                      | -                      | 48                                          | -                       |
| III (4 + 3)                         | 23                         | -                      | -                      | 14                                          | -                       |
| IV (8)                              | 3                          | -                      | -                      | 2                                           | -                       |
| V (9)                               | 5                          | -                      | -                      | 3                                           | -                       |
| Unknown                             | 2                          | -                      | -                      | 1                                           | -                       |
| Tumor cellularity, N                |                            |                        |                        |                                             |                         |
| 90-100%                             | 73                         | -                      | -                      | 49                                          | -                       |
| 70-89%                              | 38                         | -                      | -                      | 24                                          | -                       |
| 50-69%                              | 40                         | -                      | -                      | 8                                           | -                       |
| 1-3%                                | -                          | 3                      | -                      | -                                           | 0                       |
| 0%                                  | -                          | 48                     | -                      | -                                           | 25                      |
| BCR status, N                       |                            |                        |                        |                                             |                         |
| Yes (mean time to BCR, mo)          | 37 (18)                    | 16 (16)                | -                      | 30 (19)                                     | 7 (20)                  |
| No (mean follow-up, mo)             | 99 (38)                    | 32 (47)                | -                      | 49 (42)                                     | 17 (58)                 |
| Unknown                             | 15                         | 3                      | -                      | 2                                           | 1                       |
| PSA, ng/mL                          |                            |                        |                        |                                             |                         |
| Mean±SD (range)                     | 10.6±11.1<br>[2.5; 84.2]   | 9.4±8.6<br>[2.5; 44.0] | 7.3±6.6<br>[0.8; 28.1] | 10.8±9.4<br>[2.5; 44.0]                     | 10.0±9.5<br>[2.5; 44.0] |
| Unknown                             | 2                          | 1                      | 0                      | 2                                           | 1                       |
| Prostate mass, g                    |                            |                        |                        |                                             |                         |
| Mean±SD (range)                     | 48±17<br>[16; 123]         | 50±20<br>[16; 104]     | -                      | 48±17<br>[16; 123]                          | 48±20<br>[16; 104]      |
| TMPRSS2-ERG fusion transcript, N    |                            |                        |                        |                                             |                         |
| Yes                                 | 77                         | -                      | -                      | 46                                          | -                       |
| No                                  | 44                         | -                      | -                      | 26                                          | -                       |
| Unknown                             | 8                          | -                      | -                      | 9                                           | -                       |
| Age, years                          |                            |                        |                        |                                             |                         |
| Mean±SD (range)                     | 61±8<br>[41; 82]           | 62±7<br>[46; 74]       | 70±8<br>[59; 80]       | 61±8<br>[41; 82]                            | 61±6<br>[48; 74]        |

BCR—biochemical disease recurrence, PCa—prostate cancer, NPT—noncancerous prostate tissue, BPH—benign prostatic hyperplasia, PSA—prostate-specific antigen, SD—standard deviation. <sup>1</sup> The same subset of BPH samples as in “Methylation analysis in group” was also included in the gene expression analysis.

**Table S2.** Primers used for methylation-specific PCR, location of amplicons, and amplification conditions.

| Gene symbol                           | Primer pair ID | Forward primer sequence (5'-3')   | Reverse primer sequence (5'-3') | Product size, nt | Amplicon location from TSS | Primer annealing T, °C | Number of PCR cycles |
|---------------------------------------|----------------|-----------------------------------|---------------------------------|------------------|----------------------------|------------------------|----------------------|
| <i>PRKCB</i>                          | M              | TAAGCGTAGTTGGACGAGC               | AAAACGACGACCGCTACTAC            | 124              | -7/+117                    | 56                     | 36                   |
|                                       | U              | TGTTAAGTGTAGTTGGATGAGT            | AAAACAACAACCACTACTACACC         | 127              | -10/+117                   |                        |                      |
| <i>CCDC181</i><br>( <i>C1orf114</i> ) | M              | CGGTATTTTCGCGAGTTTTTATAAC         | CGAAAACGACAAAAATCTACG           | 164              | -166/-3                    | 57                     | 35                   |
|                                       | U              | TAGTGGTATTTTGTGAG-<br>TTTTTATAAT  | ACAAAAACAACAAAAATCTACACA        | 168              | -169/-2                    |                        |                      |
| <i>ADAMTS12</i>                       | M              | GAGTTCGGGAGGAAGATGTATC            | ACAACGACTACAAAACCTACCCG         | 241              | -195/+46                   | 62                     | 35                   |
|                                       | U              | GAGTTTGGGAGGAAGATGTATT            | AAACAACAACCTACAAAACCTACCA       | 243              | -195/+48                   |                        |                      |
| <i>NAALAD2</i>                        | M              | TATTTATTATGTTTCGGGTTATTGC         | CCTACTACATTCGCGAACTTC           | 244              | -116/+128                  | 58                     | 35                   |
|                                       | U              | GTTATTTATTATGTTTGGGTTATTGT        | CCTACTACATTCACAACTTCAA          | 246              | -118/+128                  |                        |                      |
| <i>ZMIZ1</i>                          | M              | TCGTTTCGAAAATTTTTTAAATC           | AACTCCCGAAACGCTATC              | 246              | -188/+58                   | 55                     | 38                   |
|                                       | U              | TGTAGTTTGTGTTT-<br>GAAAATTTTTTAAA | AACTCCCAAAACACTATCACC           | 252              | -194/+58                   |                        |                      |
| <i>FILIP1L</i>                        | M              | TACGGTTCGTTTATACGGTC              | CGACCTATAAACGTTACGTCA           | 160              | -151/+9                    | 57                     | 36                   |
|                                       | U              | GGAATTATGTTTTGTTTATATGGTT         | CCCAACCTATAAACATTACATCAC        | 167              | -156/+11                   |                        |                      |
| <i>KCTD8</i>                          | M              | TTTTTATTGTCGTCGTCGTATC            | CTCCGCGTACTCCTAACG              | 169              | +45/+213                   | 58                     | 37                   |
|                                       | U              | GTTTTTTTATTGTTGTTGTTGTATT         | ACCCTCCACATACTCCTAACA           | 175              | +42/+216                   |                        |                      |
| <i>CD44</i>                           | M              | TCGTTGAGTTTGGCGTAGATC             | ACTACCGCCGAATCCGCG              | 89               | +480/+568                  | 58                     | 35                   |
|                                       | U              | GTGTTGTTGAGTTTGGTGTAGATT          | CAAAAAAACTACCAC-<br>CAAATCCACA  | 99               | +477/+575                  |                        |                      |
| <i>EPAS1</i>                          | M              | ATATATTCGCGTCGGTGTTTC             | CGCTCGCGAATATAAACTC             | 118              | -100/+18                   | 56-57                  | 37-38                |
|                                       | U              | TGTTTATATATTTGTGTTGGTGTGTTG       | CCACTCACAAATATAAACTCCC          | 124              | -105/+19                   |                        |                      |
| <i>NEK9</i>                           | M              | TTAATAGATTTCGAGAGGTCGTATC         | CGCGAACTCGATAATAACTC            | 253              | -210/+43                   | 57                     | 38                   |
|                                       | U              | GGGTAAATAGATTTGAGAGGTT-<br>GTATT  | CCACAAAACCTCAATAATAACTCCT       | 257              | -213/+44                   |                        |                      |

All primers were designed with Methyl Primer Express® Software v1.0 (Applied Biosystems™, Thermo Fisher Scientific, Carlsbad, CA, USA). TSS – transcription start site, M/ U – primers specific for methylated/ unmethylated sequence.

**Table S3.** Primers used for quantitative methylation-specific PCR and location of amplicons.

| Gene symbol                 | Primer ID | Primer sequence (5'-3')                   | Amplicon size, bp | Amplicon location from TSS | Reference  |
|-----------------------------|-----------|-------------------------------------------|-------------------|----------------------------|------------|
| PRKCB                       | Fw        | CGTAGTTGGGGTTAGCGGTG                      | 145               | -28/+117                   | This study |
|                             | Rv        | AAAACGACGACCGCTACTACA                     |                   |                            |            |
|                             | Probe     | JOE-TTAGAGTCGGCGTAGGGGAAGCG-BHQ-1         |                   |                            |            |
| CCDC181 ( <i>C1orf114</i> ) | Fw        | GCGGTATTTTCGCGAGTTTTAT                    | 131               | -167/-37                   | This study |
|                             | Rv        | TATCCTCAAACCACCGACC                       |                   |                            |            |
|                             | Probe     | FAM-AGTATCGGGATGGGTGTCGCGA-BHQ-1          |                   |                            |            |
| ADAMTS12                    | Fw        | CGGGAGGAAGATGTATCGAGC                     | 138               | -190/-53                   | This study |
|                             | Rv        | TCAACTAACAATATCCGCTTTCG                   |                   |                            |            |
|                             | Probe     | Cy5-TTTCGTTTTGGTTATTTTATATTTTCG-BHQ-3     |                   |                            |            |
| NAALAD2                     | Fw        | TGCGAAGGTAGCGGAGGT                        | 139               | +36/+174                   | This study |
|                             | Rv        | GACCCCTAAATTCCGCCATAA                     |                   |                            |            |
|                             | Probe     | FAM-GAAGTTCGCGAATGTAGTAGGCG-BHQ-1         |                   |                            |            |
| ACTB                        | Fw        | TGGTGATGGAGGAGGTTTAGTAAGT                 | 133               | -1629/-1497                | [29]       |
|                             | Rv        | AACCAATAAAACCTACTCCTCCCTAA                |                   |                            |            |
|                             | Probe     | FAM-ACCACCACCCAACACACAATAACAAACAC A-BHQ-1 |                   |                            |            |

TSS – transcription start site, Fw/ Rv – forward/ reverse primer.

Ref [29]. Lehmann, U.; Langer, F.; Feist, H.; Glöckner, S.; Hasemeier, B.; Kreipe, H. Quantitative assessment of promoter hypermethylation during breast cancer development. *Am. J. Pathol.* **2002**, *160*, 605–612.

**Table S4.** Genes showing the most significant differences of methylation levels according to tissue histology and biochemical disease recurrence status.

| PCa vs. NPT |                  |                |              |     |         | BCR-positive vs. BCR-negative |                 |                |              |     |         |
|-------------|------------------|----------------|--------------|-----|---------|-------------------------------|-----------------|----------------|--------------|-----|---------|
| No.         | Gene/ locus      | Probe location | Methy-lation | FC  | P-value | No.                           | Gene/ locus     | Probe location | Methy-lation | FC  | P-value |
| 1           | <i>HOXC4</i>     | Intragenic     | up           | 1.3 | <0.0001 | 1                             | <i>COL23A1</i>  | Intragenic     | up           | 1.3 | <0.0001 |
| 2           | <i>CCDC181</i>   | Promoter       | up           | 1.4 | <0.0001 | 2                             | <i>HOXC9</i>    | Promoter       | up           | 1.2 | <0.0001 |
| 3           | <i>MAGI2</i>     | Intragenic     | up           | 1.5 | <0.0001 | 3                             | <i>MATN4</i>    | Promoter       | up           | 1.2 | <0.0001 |
| 4           | <i>CHGB</i>      | Promoter       | up           | 1.2 | <0.0001 | 4                             | <i>POU4F3</i>   | Intragenic     | up           | 1.3 | <0.0001 |
| 5           | <i>C8orf33</i>   | Promoter       | down         | 1.4 | <0.0001 | 5                             | <i>MECOM</i>    | Promoter       | down         | 1.2 | <0.0001 |
| 6           | <i>SOX2OT</i>    | Intragenic     | up           | 1.4 | <0.0001 | 6                             | <i>CAMTA1</i>   | Intragenic     | up           | 1.4 | <0.0001 |
| 7           | <i>PNMA6A</i>    | Intragenic     | down         | 1.6 | <0.0001 | 7                             | <i>C7orf51</i>  | Intragenic     | up           | 1.3 | 0.0001  |
| 8           | <i>CHAT</i>      | Promoter       | up           | 1.4 | <0.0001 | 8                             | <i>BMP8A</i>    | Intragenic     | up           | 1.2 | 0.0001  |
| 9           | <i>ARMC9</i>     | Intragenic     | down         | 1.2 | <0.0001 | 9                             | <i>RAPGEFL1</i> | Promoter       | up           | 1.3 | 0.0001  |
| 10          | <i>DGKG</i>      | Intragenic     | up           | 1.3 | <0.0001 | 10                            | <i>BARHL1</i>   | Promoter       | up           | 1.2 | 0.0001  |
| 11          | <i>FER1L4</i>    | Intragenic     | up           | 1.3 | <0.0001 | 11                            | <i>C1orf170</i> | Promoter       | up           | 1.5 | 0.0001  |
| 12          | <i>SLC32A1</i>   | Intragenic     | up           | 1.4 | <0.0001 | 12                            | <i>TMEM233</i>  | Intragenic     | up           | 1.2 | 0.0001  |
| 13          | <i>PCDHGC4</i>   | Intragenic     | up           | 1.3 | <0.0001 | 13                            | <i>C1D</i>      | Intragenic     | down         | 1.2 | 0.0002  |
| 14          | <i>DPYSL3</i>    | Promoter       | up           | 1.3 | <0.0001 | 14                            | <i>NFATC1</i>   | Promoter       | down         | 1.3 | 0.0002  |
| 15          | <i>GRIA3</i>     | Promoter       | up           | 1.3 | <0.0001 | 15                            | <i>CLDN5</i>    | Intragenic     | up           | 1.3 | 0.0002  |
| 16          | <i>GATA4</i>     | Intragenic     | up           | 1.2 | <0.0001 | 16                            | <i>PLK1</i>     | Intragenic     | up           | 1.3 | 0.0002  |
| 17          | <i>SGMS1</i>     | Intragenic     | up           | 1.4 | <0.0001 | 17                            | <i>CACNG7</i>   | Intragenic     | up           | 1.3 | 0.0002  |
| 18          | <i>ZIC1</i>      | Intragenic     | up           | 1.2 | <0.0001 | 18                            | <i>GSX2</i>     | Intragenic     | up           | 1.2 | 0.0002  |
| 19          | <i>C1orf229</i>  | Promoter       | down         | 1.3 | <0.0001 | 19                            | <i>C19orf20</i> | Intragenic     | up           | 1.3 | 0.0002  |
| 20          | <i>CXCL6</i>     | Intragenic     | up           | 1.4 | <0.0001 | 20                            | <i>EPHA10</i>   | Intragenic     | up           | 1.3 | 0.0002  |
| 21          | <i>DRGX</i>      | Promoter       | up           | 1.4 | <0.0001 | 21                            | <i>SPRY4</i>    | Intragenic     | down         | 1.2 | 0.0002  |
| 22          | <i>LPPR4</i>     | Intragenic     | up           | 1.3 | <0.0001 | 22                            | <i>WNT10B</i>   | Intragenic     | up           | 1.3 | 0.0002  |
| 23          | <i>MKNK1</i>     | Promoter       | up           | 1.2 | <0.0001 | 23                            | <i>TRIM54</i>   | Intragenic     | up           | 1.2 | 0.0002  |
| 24          | <i>NR2E1</i>     | Intragenic     | up           | 1.4 | <0.0001 | 24                            | <i>SV2A</i>     | Intragenic     | up           | 1.4 | 0.0003  |
| 25          | <i>MCF2L2</i>    | Intragenic     | up           | 1.4 | <0.0001 | 25                            | <i>HOPX</i>     | Intragenic     | up           | 1.2 | 0.0003  |
| 26          | <i>DPP10</i>     | Intragenic     | up           | 1.4 | <0.0001 | 26                            | <i>RSPH9</i>    | Intragenic     | up           | 1.3 | 0.0003  |
| 27          | <i>SLC24A2</i>   | Intragenic     | up           | 1.3 | <0.0001 | 27                            | <i>HOXB4</i>    | Intragenic     | up           | 1.3 | 0.0003  |
| 28          | <i>LOC648809</i> | Promoter       | up           | 1.2 | <0.0001 | 28                            | <i>SYN</i>      | Intragenic     | up           | 1.2 | 0.0003  |
| 29          | <i>ALDH1L2</i>   | Intragenic     | up           | 1.3 | <0.0001 | 29                            | <i>C2orf88</i>  | Promoter       | up           | 1.2 | 0.0003  |
| 30          | <i>HOXC11</i>    | Intragenic     | up           | 1.3 | <0.0001 | 30                            | <i>CALY</i>     | Intragenic     | up           | 1.3 | 0.0003  |
| 31          | <i>NAALAD2</i>   | Promoter       | up           | 1.5 | <0.0001 | 31                            | <i>FAM43B</i>   | Intragenic     | up           | 1.2 | 0.0003  |
| 32          | <i>EZH2</i>      | Promoter       | down         | 1.4 | <0.0001 | 32                            | <i>IGFBP7</i>   | Intragenic     | up           | 1.4 | 0.0003  |
| 33          | <i>TTC23L</i>    | Intragenic     | up           | 1.2 | <0.0001 | 33                            | <i>PLCXD1</i>   | Promoter       | down         | 1.3 | 0.0004  |

|    |                |            |    |     |         |    |                     |            |      |     |        |
|----|----------------|------------|----|-----|---------|----|---------------------|------------|------|-----|--------|
| 34 | <i>SPAG17</i>  | Promoter   | up | 1.4 | <0.0001 | 34 | <i>WBP2</i>         | Promoter   | down | 1.2 | 0.0004 |
| 35 | <i>FGD5</i>    | Promoter   | up | 1.6 | <0.0001 | 35 | <i>SCNN1B</i>       | Promoter   | up   | 1.2 | 0.0004 |
| 36 | <i>GALNT13</i> | Intragenic | up | 1.2 | <0.0001 | 36 | <i>LOC400043</i>    | Intragenic | up   | 1.2 | 0.0004 |
| 37 | <i>ZSCAN12</i> | Intragenic | up | 1.3 | <0.0001 | 37 | <i>ZNF778</i>       | Intragenic | up   | 1.2 | 0.0004 |
| 38 | <i>TRIM7</i>   | Intragenic | up | 1.3 | <0.0001 | 38 | <i>MMP25</i>        | Intragenic | up   | 1.3 | 0.0004 |
| 39 | <i>CNPY1</i>   | Intragenic | up | 1.3 | <0.0001 | 39 | <i>LOC100287042</i> | Intragenic | down | 1.3 | 0.0004 |
| 40 | <i>HOXC10</i>  | Intragenic | up | 1.4 | <0.0001 | 40 | <i>NRXN2</i>        | Intragenic | up   | 1.4 | 0.0005 |
| 41 | <i>GPR149</i>  | Intragenic | up | 1.4 | <0.0001 | 41 | <i>EXOC3L2</i>      | Intragenic | up   | 1.3 | 0.0005 |
| 42 | <i>PAX7</i>    | Intragenic | up | 1.3 | <0.0001 | 42 | <i>INSM1</i>        | Promoter   | up   | 1.3 | 0.0005 |
| 43 | <i>DLL4</i>    | Promoter   | up | 1.3 | <0.0001 | 43 | <i>SEPT9</i>        | Promoter   | up   | 1.3 | 0.0005 |
| 44 | <i>BHMT</i>    | Intragenic | up | 1.3 | <0.0001 | 44 | <i>C1orf190</i>     | Promoter   | up   | 1.2 | 0.0005 |
| 45 | <i>C6orf97</i> | Promoter   | up | 1.2 | <0.0001 | 45 | <i>SPOCK2</i>       | Intragenic | up   | 1.2 | 0.0005 |
| 46 | <i>CA3</i>     | Promoter   | up | 1.4 | <0.0001 | 46 | <i>ALLC</i>         | Promoter   | up   | 1.6 | 0.0005 |
| 47 | <i>TFPI2</i>   | Promoter   | up | 1.2 | <0.0001 | 47 | <i>MIR152</i>       | Promoter   | up   | 1.4 | 0.0005 |
| 48 | <i>VSX1</i>    | Promoter   | up | 1.2 | <0.0001 | 48 | <i>FAM100A</i>      | Promoter   | down | 1.2 | 0.0005 |
| 49 | <i>C4orf22</i> | Intragenic | up | 1.2 | <0.0001 | 49 | <i>SPTBN4</i>       | Promoter   | up   | 1.3 | 0.0005 |
| 50 | <i>HELT</i>    | Intragenic | up | 1.2 | <0.0001 | 50 | <i>ZNF471</i>       | Promoter   | down | 1.3 | 0.0005 |

Values are given for the most significant microarray probe per gene/ annotated locus. PCa – prostate tumors, NPT – noncancerous prostate tissues, BCR – biochemical disease recurrence, FC – absolute fold change value.

**Table S5.** Associations of promoter methylation and gene expression with clinico-pathological variables and *TMPRSS2-ERG* fusion status in prostate tumors.

| Promoter methylation | pT3-4 vs. pT2 |               | pISUP grade group |         | <i>TMPRSS2-ERG</i> + vs. - |               | PSA             |         | Prostate volume |         | Age             |         |
|----------------------|---------------|---------------|-------------------|---------|----------------------------|---------------|-----------------|---------|-----------------|---------|-----------------|---------|
|                      | %             | P-value       | H                 | P-value | %                          | P-value       | Z <sub>ad</sub> | P-value | Z <sub>ad</sub> | P-value | Z <sub>ad</sub> | P-value |
| <i>PRKCB</i>         | 81.8 vs. 66.7 | 0.0589        | 7.19              | 0.0659  | 83.1 vs. 61.4              | <b>0.0151</b> | 1.91            | 0.0555  | -0.17           | 0.4433  | 0.11            | 0.9123  |
| <i>CCDC181</i>       | 94.5 vs. 88.5 | 0.2594        | 2.85              | 0.4150  | 92.2 vs. 88.6              | 0.5260        | 0.22            | 0.8275  | 1.22            | 0.2237  | 1.30            | 0.1924  |
| <i>ADAMTS12</i>      | 92.7 vs. 82.3 | 0.0898        | 5.58              | 0.1338  | 89.6 vs. 75.0              | <b>0.0406</b> | 0.43            | 0.6665  | -0.70           | 0.4859  | 1.28            | 0.2021  |
| <i>ZMIZ1</i>         | 94.5 vs. 81.3 | <b>0.0273</b> | 6.46              | 0.0914  | 85.7 vs. 86.4              | >0.9999       | 1.94            | 0.0528  | 0.58            | 0.5593  | 1.41            | 0.1577  |
| <i>FILIP1L</i>       | 89.1 vs. 78.1 | 0.1223        | 1.93              | 0.5875  | 88.3 vs. 75.0              | 0.0755        | 0.70            | 0.4810  | 0.70            | 0.4810  | -0.12           | 0.9071  |
| <i>NAALAD2</i>       | 74.5 vs. 65.6 | 0.2785        | 7.57              | 0.0557  | 71.4 vs. 70.5              | >0.9999       | 1.60            | 0.1105  | -0.06           | 0.9487  | 0.76            | 0.4483  |
| <i>CD44</i>          | 36.4 vs. 33.3 | 0.7248        | 0.60              | 0.8957  | 40.3 vs. 20.5              | <b>0.0286</b> | -0.43           | 0.6686  | 0.91            | 0.3612  | 1.12            | 0.2639  |
| <i>KCTD8</i>         | 36.4 vs. 12.5 | <b>0.0008</b> | 6.49              | 0.0902  | 31.2 vs. 6.8               | <b>0.0015</b> | 0.98            | 0.3248  | -0.49           | 0.6275  | 0.44            | 0.6568  |

  

| Gene expression | pT              |         | pISUP grade group |               | <i>TMPRSS2-ERG</i> + vs. - |               | PSA            |         | Prostate volume |         | Age            |               |
|-----------------|-----------------|---------|-------------------|---------------|----------------------------|---------------|----------------|---------|-----------------|---------|----------------|---------------|
|                 | Z <sub>ad</sub> | P-value | R <sub>s</sub>    | P-value       | Z <sub>ad</sub>            | P-value       | R <sub>s</sub> | P-value | R <sub>s</sub>  | P-value | R <sub>s</sub> | P-value       |
| <i>PRKCB</i>    | -0.45           | 0.6528  | -0.16             | 0.1439        | 0.17                       | 0.8674        | -0.17          | 0.1362  | 0.00            | 0.9815  | 0.13           | 0.2456        |
| <i>CCDC181</i>  | -0.65           | 0.5154  | -0.35             | <b>0.0016</b> | 2.47                       | <b>0.0136</b> | -0.20          | 0.0755  | -0.01           | 0.9482  | 0.15           | 0.1698        |
| <i>ADAMTS12</i> | -0.35           | 0.7248  | 0.13              | 0.2570        | 0.97                       | 0.3323        | -0.12          | 0.2958  | 0.05            | 0.6676  | 0.01           | 0.9334        |
| <i>ZMIZ1</i>    | -0.29           | 0.7692  | -0.07             | 0.5211        | -0.09                      | 0.9313        | 0.11           | 0.3433  | 0.03            | 0.8052  | 0.02           | 0.8385        |
| <i>NAALAD2</i>  | -1.07           | 0.2864  | -0.35             | <b>0.0015</b> | -0.03                      | 0.9742        | -0.19          | 0.0972  | -0.03           | 0.8003  | 0.27           | <b>0.0153</b> |

pT – pathological tumor stage, pISUP – pathological ISUP grading, ISUP – International Society of Urological Pathology, *TMPRSS2-ERG*+/- – *TMPRSS2-ERG* fusion positive/ negative status, PSA – prostate-specific antigen, H – Kruskal-Wallis's H parameter, Z<sub>ad</sub> – Mann-Whitney's Z adjusted parameter, R<sub>s</sub> – Spearman's correlation coefficient. Significant P-values are in bold.



**Table S6.** Univariate Cox proportional hazard analysis of molecular and/or clinico-pathological variables in Lithuanian and The Cancer Genome Atlas (TCGA) prostate cancer cohorts. For simplicity, only models' P-values are provided for TCGA data.

| No.                            | Covariates                              | Lithuanian cohort   |                     |                 | TCGA cohort           |                 |
|--------------------------------|-----------------------------------------|---------------------|---------------------|-----------------|-----------------------|-----------------|
|                                |                                         | HR (95% CI)         | Covariate's P-value | Model's P-value | HR (95% CI)           | Model's P-value |
| Clinico-pathological variables |                                         |                     |                     |                 |                       |                 |
| 1                              | pT (3 <i>vs.</i> 2)                     | 4.68 (2.30; 9.51)   | < <b>0.0001</b>     | < <b>0.0001</b> | 0.11 (0.03; 0.49)     | <b>0.0001</b>   |
| 2                              | pISUP grade group (5 groups)            | 2.93 (2.06; 4.16)   | < <b>0.0001</b>     | < <b>0.0001</b> | 2.00 (1.44; 2.80)     | < <b>0.0001</b> |
| 3                              | Prostate volume (cont.)                 | 1.01 (0.99; 1.03)   | 0.2001              | 0.2226          | n. a.                 | n. a.           |
| 4                              | PSA (cont.)                             | 1.02 (1.00; 1.04)   | <b>0.0342</b>       | 0.0682          | 1.02 (0.96; 1.08)     | 0.4881          |
| 5                              | Age (cont.)                             | 1.00 (0.95; 1.04)   | 0.9241              | 0.9239          | 1.02 (0.96; 1.08)     | 0.4655          |
| Promoter methylation           |                                         |                     |                     |                 |                       |                 |
| 6                              | <i>PRKCB</i> (M <i>vs.</i> U/ cont.)    | 6.31 (1.52; 26.10)  | <b>0.0115</b>       | <b>0.0008</b>   | 4.90 (0.81; 29.59)    | 0.0795          |
| 7                              | <i>CCDC181</i> (M <i>vs.</i> U/ cont.)  | 4.18 (0.58; 30.29)  | 0.1585              | 0.0725          | 7.22 (0.85; 61.18)    | 0.0702          |
| 8                              | <i>ADAMTS12</i> (M <i>vs.</i> U/ cont.) | >1000               | 0.9496              | <b>0.0003</b>   | 49.36 (0.60; 4093.06) | 0.0624          |
| 9                              | <i>NAALAD2</i> (M <i>vs.</i> U/ cont.)  | 6.08 (1.86; 19.84)  | <b>0.0029</b>       | <b>0.0002</b>   | 7.38 (0.69; 79.12)    | 0.0911          |
| 10                             | <i>ZMIZ1</i> (M <i>vs.</i> U/ cont.)    | 3.51 (0.85; 14.57)  | 0.0845              | <b>0.0368</b>   | 0.28 (0.00; 107.98)   | 0.6455          |
| Gene expression                |                                         |                     |                     |                 |                       |                 |
| 11                             | <i>PRKCB</i> (cont.)                    | 0.60 (0.27; 1.34)   | 0.2118              | 0.1836          | 1.02 (1.00; 1.04)     | <b>0.0378</b>   |
| 12                             | <i>CCDC181</i> (cont.)                  | 0.00 (0.00; 28.14)  | 0.1329              | 0.1111          | 0.98 (0.94; 1.01)     | 0.1856          |
| 13                             | <i>ADAMTS12</i> (cont.)                 | 2.26 (0.02; 262.82) | 0.7375              | 0.7387          | 1.02 (1.00; 1.04)     | <b>0.0321</b>   |
| 14                             | <i>ZMIZ1</i> (cont.)                    | 0.94 (0.82; 1.09)   | 0.4090              | 0.3960          | 1.00 (1.00; 1.00)     | 0.0548          |
| 15                             | <i>NAALAD2</i> (cont.)                  | 0.00 (0.00; 0.17)   | <b>0.0205</b>       | <b>0.0059</b>   | 1.00 (0.99; 1.00)     | 0.7077          |
| 16                             | <i>TMPRSS2-ERG</i> (yes <i>vs.</i> no)  | 0.70 (0.34; 1.44)   | 0.3328              | 0.3375          | n. a.                 | n. a.           |

M/U – methylated/ unmethylated promoter status, cont. – continuous variable, *TMPRSS2-ERG* – fusion transcript status, pT – pathological tumor stage, pISUP – pathological ISUP grading, ISUP – International Society of Urological Pathology, PSA – prostate-specific antigen, HR – hazard ratio, CI – confidence intervals. Significant P-values are in bold, n.a. – not available/ not analyzed.

**Table S7.** Multivariate Cox proportional hazard analysis of protein-coding gene methylation and other molecular and/or clinico-pathological variables in Lithuanian and The Cancer Genome Atlas (TCGA) prostate cancer cohorts.

| No.                                              | Covariates                         | Lithuanian cohort  |                     | TCGA cohort     |                 |
|--------------------------------------------------|------------------------------------|--------------------|---------------------|-----------------|-----------------|
|                                                  |                                    | HR (95% CI)        | Covariate's P-value | Model's P-value | Model's P-value |
| Combinations with clinico-pathological variables |                                    |                    |                     |                 |                 |
| 1                                                | pT (3 vs. 2)                       | 4.14 (2.04; 8.42)  | <b>0.0001</b>       | <0.0001*        | <b>0.0002</b>   |
|                                                  | <i>PRKCB</i> (M vs. U/ cont.)      | 5.18 (1.24; 21.55) | <b>0.0245</b>       |                 |                 |
| 2                                                | pT (3 vs. 2)                       | 4.34 (2.14; 8.82)  | <b>0.0001</b>       | <0.0001*        | <b>0.0001</b>   |
|                                                  | <i>NAALAD2</i> (M vs. U/ cont.)    | 5.55 (1.70; 18.15) | <b>0.0048</b>       |                 |                 |
| 3                                                | pISUP grade group (5 groups)       | 2.65 (1.86; 3.79)  | < <b>0.0001</b>     | <0.0001*        | <0.0001         |
|                                                  | <i>PRKCB</i> (M vs. U/ cont.)      | 4.51 (1.07; 18.93) | <b>0.0408</b>       |                 |                 |
| 4                                                | pISUP grade group (5 groups)       | 2.61 (1.83; 3.72)  | < <b>0.0001</b>     | <0.0001*        | <0.0001         |
|                                                  | <i>NAALAD2</i> (M vs. U/ cont.)    | 4.50 (1.36; 14.94) | <b>0.0145</b>       |                 |                 |
| 5                                                | PSA (cont.)                        | 1.02 (1.00; 1.04)  | <b>0.0403</b>       | <b>0.0008*</b>  | 0.5903          |
|                                                  | <i>PRKCB</i> (M vs. U/ cont.)      | 6.28 (1.52; 26.02) | <b>0.0117</b>       |                 |                 |
| 6                                                | PSA (cont.)                        | 1.02 (1.00; 1.04)  | 0.0862              | <b>0.0001</b>   | 0.7838          |
|                                                  | <i>PRKCB</i> (M vs. U/ cont.)      | 3.76 (0.87; 16.25) | 0.0778              |                 |                 |
|                                                  | <i>NAALAD2</i> (M vs. U/ cont.)    | 3.70 (1.09; 12.60) | <b>0.0371</b>       |                 |                 |
| Combinations of gene promoter methylation        |                                    |                    |                     |                 |                 |
| 7                                                | <i>PRKCB</i> (M vs. U/ cont.)      | 3.84 (0.90; 16.35) | 0.0704              | <b>0.0001</b>   | 0.1314          |
|                                                  | <i>NAALAD2</i> (M vs. U/ cont.)    | 4.30 (1.28; 14.46) | <b>0.0191</b>       |                 |                 |
| 8                                                | <i>ADAMTS12</i> (M vs. U/ cont.)   | >1000              | 0.9522              | < <b>0.0001</b> | 0.1132          |
|                                                  | <i>NAALAD2</i> (M vs. U/ cont.)    | 3.81 (1.16; 12.46) | <b>0.0279</b>       |                 |                 |
| 9                                                | <i>PRKCB</i> (M vs. U/ cont.)      | 3.28 (0.79; 13.63) | 0.1033              | < <b>0.0001</b> | 0.2001          |
|                                                  | <i>ADAMTS12</i> (M vs. U/ cont.)   | >1000              | 0.9524              |                 |                 |
|                                                  | <i>NAALAD2</i> (M vs. U/ cont.)    | 3.46 (1.04; 11.45) | <b>0.0433</b>       |                 |                 |
| 10                                               | <i>NAALAD2</i> (M vs. U/ cont.)    | 5.10 (1.18; 22.08) | <b>0.0303</b>       | <b>0.0007</b>   | 0.2267          |
|                                                  | <i>NAALAD2</i> (expression, cont.) | 0.00 (0.00; 2.70)  | 0.0828              |                 |                 |
| Combinations with fusion transcript status       |                                    |                    |                     |                 |                 |
| 11                                               | <i>TMPRSS2-ERG</i> (yes vs. no)    | 1.61 (0.80; 3.27)  | 0.1872              | <b>0.0113</b>   | n.a.            |
|                                                  | <i>PRKCB</i> (M vs. U/ cont.)      | 5.30 (1.26; 22.25) | <b>0.0233</b>       |                 |                 |
| 12                                               | <i>TMPRSS2-ERG</i> (yes vs. no)    | 0.48 (0.23; 1.02)  | 0.0582              | <b>0.0002</b>   | n.a.            |
|                                                  | <i>ADAMTS12</i> (M vs. U/ cont.)   | >1000              | 0.9479              |                 |                 |
| 13                                               | <i>TMPRSS2-ERG</i> (yes vs. no)    | 1.48 (0.73; 3.00)  | 0.2748              | <b>0.0003</b>   | n.a.            |
|                                                  | <i>NAALAD2</i> (M vs. U/ cont.)    | 8.57 (2.04; 35.92) | <b>0.0035</b>       |                 |                 |

Selected combinations are shown. For simplicity, only models' P-values are provided for TCGA data. M/U – methylated/unmethylated promoter status, *TMPRSS2-ERG* – fusion transcript status, pT – pathological tumor stage, pISUP – pathological ISUP grading, ISUP – International Society of Urological Pathology, PSA – prostate-specific antigen, HR – hazard ratio, CI – confidence intervals. Significant P-values are in bold, n.a. – not analyzed. \*Forward entering of covariates.
